# Supplementary material
Source: MDPI journal article supplement (https://www.mdpi.com/2073-4344/12/11/1473)
Supplement: s1 [file s1]

# Heterologous Lignan Production in Stirred-Tank Reactors – Metabolomics-Assisted Bioprocess Development for an In Vivo Enzyme Cascade

Andrea Steinmann <sup>1</sup>, Maurice Finger <sup>1</sup>, Christian Nowacki <sup>1</sup>, Davide Decembrino <sup>2</sup>, Georg Hubmann <sup>1</sup>, Marco Girhard <sup>2</sup>, Vlada B. Urlacher <sup>2</sup> and Stephan Lütz <sup>1,\*</sup>

<sup>1</sup> Chair for Bioprocess Engineering, TU Dortmund University, Emil-Figge-Straße 66, 44227 Dortmund, Germany

<sup>2</sup> Institute of Biochemistry, Heinrich-Heine University, Universitätsstraße 1, 40225 Düsseldorf, Germany

\* Correspondence: stephan.luetz@tu-dortmund.de

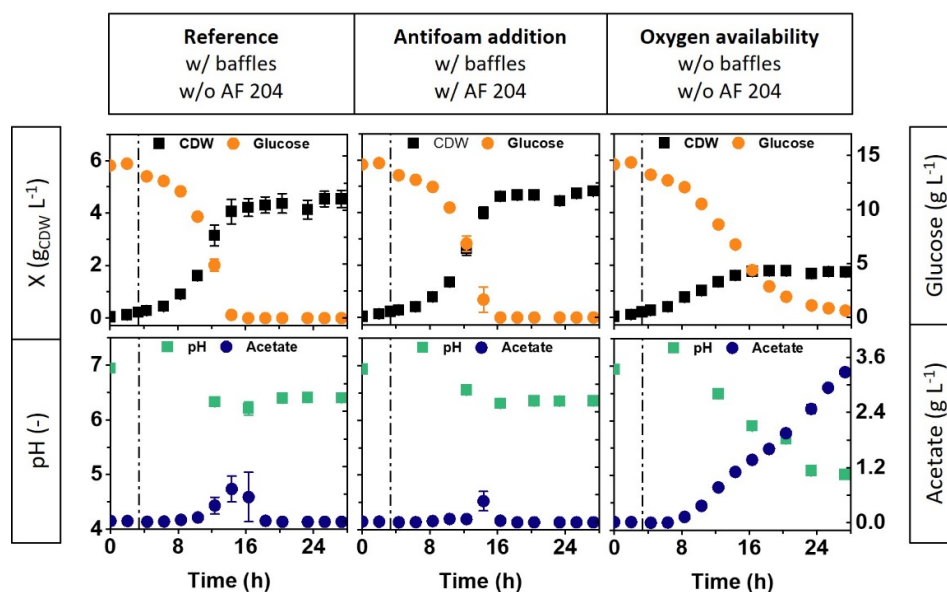

**Figure S1.** Influence of antifoam addition and oxygen availability on growth parameters in shake flasks. *Escherichia coli* (*E. coli*) C43(DE3) pCDFDuet\_syfiPLR was cultivated at 37 °C, 180 rpm, in modified Riesenberg medium (15 g L<sup>-1</sup> glucose). At an optical density at 600 nm (OD<sub>600</sub>) of 0.6, 0.75 mM isopropyl-β-D-thiogalactopyranoside (IPTG) were added for induction. 50 μM CuSO<sub>4</sub> and 0.5 g L<sup>-1</sup> coniferyl alcohol were added at the same time (indicated by pointed-dashed line). After induction, cultivation temperature was decreased to 30 °C. Cultivations were ended 24 h after induction. Cultivations were performed in baffled (w/ baffles) or unbaffled shake flasks (w/o baffles). For some shake flask cultivations, 0.01% (v/v) antifoam 204 (w/ AF204) was added.

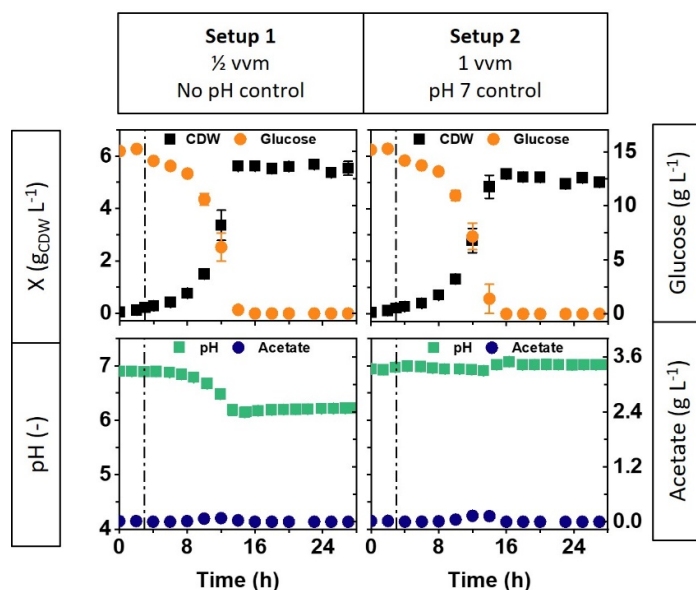

**Figure S2.** Effect of various STR process conditions on growth parameters. *E. coli* C43(DE3) pCDFDuet\_syfiPLR was cultivated at 37 °C, 1000 rpm, in modified Riesenbergl medium (15 g L<sup>-1</sup> glucose, 0.01% (v/v) AF204). At OD<sub>600</sub> 0.6, 0.75 mM IPTG, 0.5 g L<sup>-1</sup> coniferyl alcohol and 50 µM CuSO<sub>4</sub> were added (indicated by pointed-dashed line). After induction, cultivation temperature was decreased to 30 °C. Cultivations were ended 24 h after induction. Bioreactor cultivations were aerated with 6 L h<sup>-1</sup> (0.5 volume gas per volume liquid per minute, vvm) or 12 L h<sup>-1</sup> (1 vvm) compressed air. pH of cultivations was either not regulated or maintained at pH 7.0.

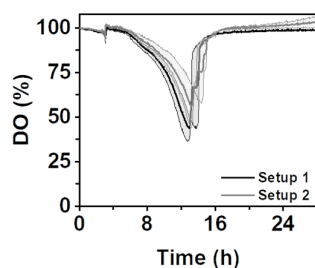

**Figure S3.** DO during testing of various STR process conditions. *E. coli* C43(DE3) pCDFDuet\_syfiPLR was cultivated at 37 °C, 1000 rpm in modified Riesenbergl medium (15 g L<sup>-1</sup> glucose, 0.01% AF204). At OD<sub>600</sub> 0.6, 0.75 mM IPTG, 0.5 g L<sup>-1</sup> coniferyl alcohol and 50 µM CuSO<sub>4</sub> were added. After induction, cultivation temperature was decreased to 30 °C. Cultivations were ended 24 h after induction. For Setup 1, 6 L h<sup>-1</sup> (0.5 vvm) compressed air and no pH regulation were used. Setup 2 was run with 12 L h<sup>-1</sup> (1 vvm) compressed air and regulated at pH 7.

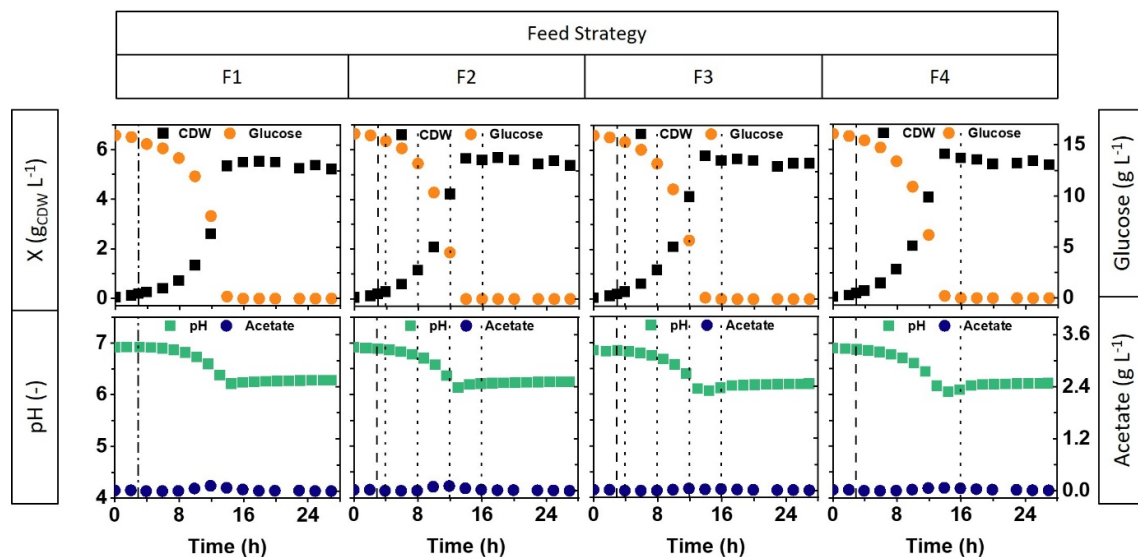

**Figure S4.** Growth parameters for comparison of substrate feeding strategies during STR cultivation. *E. coli* C43(DE3) pCDFDuet\_syfiPLR was cultivated at 37 °C, 1000 rpm in modified Riesenberg medium (15 g L<sup>-1</sup> glucose, 0.01% AF204). At OD<sub>600</sub> 0.6, 0.75 mM IPTG and 50 µM CuSO<sub>4</sub> were added (pointed-dashed or dashed line). After induction, cultivation temperature was decreased to 30 °C. For F1, 0.5 g L<sup>-1</sup> conferyl alcohol was added at the time of induction (pointed-dashed line). Regarding F2 and F3, the amount of substrate corresponding to a final concentration of 0.5 g L<sup>-1</sup> conferyl alcohol was split and supplemented at 1, 5, 9, and 13 h after induction (pointed lines). For F2, substrate was added in a linear pulsed feed of 25% (corresponding to 125 mg L<sup>-1</sup>) or for F3 in an exponential pulsed feed profile with 1.25% (6.25 mg L<sup>-1</sup>), 5% (25 mg L<sup>-1</sup>), 18.75% (93.75 mg L<sup>-1</sup>) and 75% (375 mg L<sup>-1</sup>). For F4, 0.5 g L<sup>-1</sup> conferyl alcohol was added at 13 h after induction (pointed line). Cultivations were ended 24 h after induction.
